# Supplementary material for: Environmental Impact Assessment of Rice–Wheat Rotation Considering Annual Nitrogen Application Rate
Source: MDPI journal article supplement (doi:10.3390/agronomy14010151), 2024-01-09
Supplement: s1 [file s1]

Article

# Environmental Impact Assessment of Rice–Wheat Rotation Considering Annual Nitrogen Application Rate

Yulin Yang<sup>1,2,3</sup>, Xiaohu Liu<sup>1,2,3</sup>, Yinglong Chen<sup>1,2,3</sup>, Qiang Xu<sup>1,2,3</sup>, Qigen Dai<sup>1,2,3\*</sup>, Huanhe Wei<sup>1,2,3</sup>, Ke Xu<sup>1,2,3</sup>, Hongcheng Zhang<sup>1,2,3</sup>

<sup>1</sup> Jiangsu Key Laboratory of Crop Genetics and Physiology/Jiangsu Key Laboratory of Crop Cultivation and Physiology, Agricultural College of Yangzhou University, Yangzhou 225009, China; dx120200100@stu.yzu.edu.cn (Y.Y.); mx120220749@stu.yzu.edu.cn (X.L.); chenyinglong@yzu.edu.cn (Y.C.); qiangxu@yzu.edu.cn (Q.X.); 006931@yzu.edu.cn (H.W.); xuke@yzu.edu.cn (K.X.); hc Zhang@yzu.edu.cn (H.Z.)

<sup>2</sup> Jiangsu Co-Innovation Center for Modern Production Technology of Grain Crops, Yangzhou University, Yangzhou 225009, China

<sup>3</sup> Research Institute of Rice Industrial Engineering Technology of Yangzhou University, Yangzhou 225009, China

\* Correspondence: qgdai@yzu.edu.cn

**Table S1.** Life cycle inventory of rice-wheat rotation from 2020 to 2021.

| Treatments | Rice2020         |                  |                                                  |                  |                        |                  |                  |                  |                  | Wheat2020-2021   |                  |                                                  |                  |                        |                  |                  |                  |                  | Annual yield     |
|------------|------------------|------------------|--------------------------------------------------|------------------|------------------------|------------------|------------------|------------------|------------------|------------------|------------------|--------------------------------------------------|------------------|------------------------|------------------|------------------|------------------|------------------|------------------|
|            | Seed             | Urea             | Ca(H <sub>2</sub> PO <sub>4</sub> ) <sub>2</sub> | KCl              | Pesticide <sup>a</sup> | Diesel           | Electricity      | Irrigation       | Yield            | Seed             | Urea             | Ca(H <sub>2</sub> PO <sub>4</sub> ) <sub>2</sub> | KCl              | Pesticide <sup>a</sup> | Diesel           | Electricity      | Irrigation       | Yield            |                  |
|            | —                | —                | —                                                | —                | —                      | —                | —                | —                | —                | —                | —                | —                                                | —                | —                      | —                | —                | —                | —                |                  |
|            | kg               | kg               | kg                                               | kg               | kg                     | L                | kWh              | m <sup>3</sup>   | kg               | kg               | kg               | kg                                               | kg               | kg                     | L                | kWh              | m <sup>3</sup>   | kg               | kg               |
|            | ha <sup>-1</sup> | ha <sup>-1</sup> | ha <sup>-1</sup>                                 | ha <sup>-1</sup> | ha <sup>-1</sup>       | ha <sup>-1</sup> | ha <sup>-1</sup> | ha <sup>-1</sup> | ha <sup>-1</sup> | ha <sup>-1</sup> | ha <sup>-1</sup> | ha <sup>-1</sup>                                 | ha <sup>-1</sup> | ha <sup>-1</sup>       | ha <sup>-1</sup> | ha <sup>-1</sup> | ha <sup>-1</sup> | ha <sup>-1</sup> | ha <sup>-1</sup> |
| R0W0       | 60               | 0                | 395                                              | 263              | 12.4                   | 120              | 300              | 6500             | 4972             | 150              | 0                | 750                                              | 240              | 5.5                    | 80               |                  |                  | 1803             | 6776             |
| R0W180     | 60               | 0                | 395                                              | 263              | 12.4                   | 120              | 300              | 6500             | 6056             | 150              | 409              | 750                                              | 240              | 5.5                    | 80               |                  |                  | 4140             | 10196            |
| R0W240     | 60               | 0                | 395                                              | 263              | 12.4                   | 120              | 300              | 6500             | 6305             | 150              | 545              | 750                                              | 240              | 5.5                    | 80               |                  |                  | 5406             | 11711            |
| R0W300     | 60               | 0                | 395                                              | 263              | 12.4                   | 120              | 300              | 6500             | 6358             | 150              | 682              | 750                                              | 240              | 5.5                    | 80               |                  |                  | 5184             | 11541            |
| R0W360     | 60               | 0                | 395                                              | 263              | 12.4                   | 120              | 300              | 6500             | 6341             | 150              | 818              | 750                                              | 240              | 5.5                    | 80               |                  |                  | 4738             | 11079            |
| R180W0     | 60               | 409              | 395                                              | 263              | 12.4                   | 120              | 300              | 6500             | 7719             | 150              | 0                | 750                                              | 240              | 5.5                    | 80               |                  |                  | 1909             | 9628             |
| R180W180   | 60               | 409              | 395                                              | 263              | 12.4                   | 120              | 300              | 6500             | 7919             | 150              | 409              | 750                                              | 240              | 5.5                    | 80               |                  |                  | 4465             | 12384            |
| R180W240   | 60               | 409              | 395                                              | 263              | 12.4                   | 120              | 300              | 6500             | 7938             | 150              | 545              | 750                                              | 240              | 5.5                    | 80               |                  |                  | 5521             | 13458            |
| R180W300   | 60               | 409              | 395                                              | 263              | 12.4                   | 120              | 300              | 6500             | 8011             | 150              | 682              | 750                                              | 240              | 5.5                    | 80               |                  |                  | 5269             | 13280            |
| R180W360   | 60               | 409              | 395                                              | 263              | 12.4                   | 120              | 300              | 6500             | 8032             | 150              | 818              | 750                                              | 240              | 5.5                    | 80               |                  |                  | 4627             | 12659            |
| R240W0     | 60               | 545              | 395                                              | 263              | 12.4                   | 120              | 300              | 6500             | 9089             | 150              | 0                | 750                                              | 240              | 5.5                    | 80               |                  |                  | 2016             | 11105            |
| R240W180   | 60               | 545              | 395                                              | 263              | 12.4                   | 120              | 300              | 6500             | 9274             | 150              | 409              | 750                                              | 240              | 5.5                    | 80               |                  |                  | 4668             | 13942            |

|              |    |     |     |     |      |     |     |      |      |     |     |     |     |     |    |  |      |       |
|--------------|----|-----|-----|-----|------|-----|-----|------|------|-----|-----|-----|-----|-----|----|--|------|-------|
| R240W2<br>40 | 60 | 545 | 395 | 263 | 12.4 | 120 | 300 | 6500 | 9308 | 150 | 545 | 750 | 240 | 5.5 | 80 |  | 5676 | 14984 |
| R240W3<br>00 | 60 | 545 | 395 | 263 | 12.4 | 120 | 300 | 6500 | 9386 | 150 | 682 | 750 | 240 | 5.5 | 80 |  | 5129 | 14515 |
| R240W3<br>60 | 60 | 545 | 395 | 263 | 12.4 | 120 | 300 | 6500 | 9392 | 150 | 818 | 750 | 240 | 5.5 | 80 |  | 4784 | 14176 |
| R300W0       | 60 | 682 | 395 | 263 | 12.4 | 120 | 300 | 6500 | 9859 | 150 | 0   | 750 | 240 | 5.5 | 80 |  | 2425 | 12284 |
| R300W1<br>80 | 60 | 682 | 395 | 263 | 12.4 | 120 | 300 | 6500 | 9924 | 150 | 409 | 750 | 240 | 5.5 | 80 |  | 4831 | 14755 |
| R300W2<br>40 | 60 | 682 | 395 | 263 | 12.4 | 120 | 300 | 6500 | 9936 | 150 | 545 | 750 | 240 | 5.5 | 80 |  | 5804 | 15741 |
| R300W3<br>00 | 60 | 682 | 395 | 263 | 12.4 | 120 | 300 | 6500 | 9953 | 150 | 682 | 750 | 240 | 5.5 | 80 |  | 5210 | 15163 |
| R300W3<br>60 | 60 | 682 | 395 | 263 | 12.4 | 120 | 300 | 6500 | 9952 | 150 | 818 | 750 | 240 | 5.5 | 80 |  | 4695 | 14647 |
| R360W0       | 60 | 818 | 395 | 263 | 12.4 | 120 | 300 | 6500 | 8670 | 150 | 0   | 750 | 240 | 5.5 | 80 |  | 2522 | 11193 |
| R360W1<br>80 | 60 | 818 | 395 | 263 | 12.4 | 120 | 300 | 6500 | 8633 | 150 | 409 | 750 | 240 | 5.5 | 80 |  | 4960 | 13594 |
| R360W2<br>40 | 60 | 818 | 395 | 263 | 12.4 | 120 | 300 | 6500 | 8636 | 150 | 545 | 750 | 240 | 5.5 | 80 |  | 5663 | 14299 |
| R360W3<br>00 | 60 | 818 | 395 | 263 | 12.4 | 120 | 300 | 6500 | 8605 | 150 | 682 | 750 | 240 | 5.5 | 80 |  | 5078 | 13683 |
| R360W3<br>60 | 60 | 818 | 395 | 263 | 12.4 | 120 | 300 | 6500 | 8574 | 150 | 818 | 750 | 240 | 5.5 | 80 |  | 4788 | 13362 |
| R420W0       | 60 | 955 | 395 | 263 | 12.4 | 120 | 300 | 6500 | 7832 | 150 | 0   | 750 | 240 | 5.5 | 80 |  | 2693 | 10525 |
| R420W1<br>80 | 60 | 955 | 395 | 263 | 12.4 | 120 | 300 | 6500 | 7807 | 150 | 409 | 750 | 240 | 5.5 | 80 |  | 5007 | 12815 |

|              |    |     |     |     |      |     |     |      |      |     |     |     |     |     |    |  |      |       |
|--------------|----|-----|-----|-----|------|-----|-----|------|------|-----|-----|-----|-----|-----|----|--|------|-------|
| R420W2<br>40 | 60 | 955 | 395 | 263 | 12.4 | 120 | 300 | 6500 | 7781 | 150 | 545 | 750 | 240 | 5.5 | 80 |  | 5511 | 13292 |
| R420W3<br>00 | 60 | 955 | 395 | 263 | 12.4 | 120 | 300 | 6500 | 7744 | 150 | 682 | 750 | 240 | 5.5 | 80 |  | 5030 | 12774 |
| R420W3<br>60 | 60 | 955 | 395 | 263 | 12.4 | 120 | 300 | 6500 | 7716 | 150 | 818 | 750 | 240 | 5.5 | 80 |  | 4739 | 12454 |

<sup>a</sup> Pesticides were calculated as the total of insecticide, herbicide, and fungicide (active ingredient).

**Table S2.** Life cycle inventory of rice-wheat rotation from 2021 to 2022.

| Treatm<br>ents | Rice2021            |                     |                                                      |                     |                            |                       |                         |                                 |                        | Wheat2021-2022      |                     |                                                      |                     |                            |                     |                     |                                 |                        | Ann<br>ual<br>yield    |
|----------------|---------------------|---------------------|------------------------------------------------------|---------------------|----------------------------|-----------------------|-------------------------|---------------------------------|------------------------|---------------------|---------------------|------------------------------------------------------|---------------------|----------------------------|---------------------|---------------------|---------------------------------|------------------------|------------------------|
|                | Se<br>ed            | Ur<br>ea            | Ca(H <sub>2</sub> P<br>O <sub>4</sub> ) <sub>2</sub> | K<br>Cl             | Pestic<br>ide <sup>a</sup> | Die<br>sel            | Electri<br>city         | Irrigat<br>ion                  | Yiel<br>d              | Se<br>ed            | Ur<br>ea            | Ca(H <sub>2</sub> P<br>O <sub>4</sub> ) <sub>2</sub> | K<br>Cl             | Pestic<br>ide <sup>a</sup> | Die<br>sel          | Electri<br>city     | Irrigat<br>ion                  | Yie<br>ld              |                        |
|                | —                   | —                   | —                                                    | —                   | —                          | —                     | —                       | —                               | —                      | —                   | —                   | —                                                    | —                   | —                          | —                   | —                   | —                               | —                      |                        |
|                | kg ha <sup>-1</sup> | kg ha <sup>-1</sup> | kg ha <sup>-1</sup>                                  | kg ha <sup>-1</sup> | kg ha <sup>-1</sup>        | L<br>ha <sup>-1</sup> | kWh<br>ha <sup>-1</sup> | m <sup>3</sup> ha <sup>-1</sup> | kg<br>ha <sup>-1</sup> | kg ha <sup>-1</sup> | kg ha <sup>-1</sup> | kg ha <sup>-1</sup>                                  | kg ha <sup>-1</sup> | kg ha <sup>-1</sup>        | kg ha <sup>-1</sup> | kg ha <sup>-1</sup> | m <sup>3</sup> ha <sup>-1</sup> | kg<br>ha <sup>-1</sup> | kg<br>ha <sup>-1</sup> |
| R0W0           | 60                  | 0                   | 395                                                  | 26<br>3             | 12.4                       | 120                   | 300                     | 6500                            | 5184                   | 15<br>0             | 0                   | 750                                                  | 24<br>0             | 5.5                        | 80                  |                     |                                 | 162<br>9               | 6813                   |
| R0W18<br>0     | 60                  | 0                   | 395                                                  | 26<br>3             | 12.4                       | 120                   | 300                     | 6500                            | 6331                   | 15<br>0             | 409                 | 750                                                  | 24<br>0             | 5.5                        | 80                  |                     |                                 | 481<br>9               | 1115<br>0              |
| R0W24<br>0     | 60                  | 0                   | 395                                                  | 26<br>3             | 12.4                       | 120                   | 300                     | 6500                            | 6400                   | 15<br>0             | 545                 | 750                                                  | 24<br>0             | 5.5                        | 80                  |                     |                                 | 647<br>3               | 1287<br>3              |
| R0W30<br>0     | 60                  | 0                   | 395                                                  | 26<br>3             | 12.4                       | 120                   | 300                     | 6500                            | 6420                   | 15<br>0             | 682                 | 750                                                  | 24<br>0             | 5.5                        | 80                  |                     |                                 | 574<br>2               | 1216<br>2              |
| R0W36<br>0     | 60                  | 0                   | 395                                                  | 26<br>3             | 12.4                       | 120                   | 300                     | 6500                            | 6426                   | 15<br>0             | 818                 | 750                                                  | 24<br>0             | 5.5                        | 80                  |                     |                                 | 542<br>8               | 1185<br>4              |

|              |    |     |     |         |      |     |     |      |           |         |     |     |         |     |    |  |          |           |
|--------------|----|-----|-----|---------|------|-----|-----|------|-----------|---------|-----|-----|---------|-----|----|--|----------|-----------|
| R180W<br>0   | 60 | 409 | 395 | 26<br>3 | 12.4 | 120 | 300 | 6500 | 8049      | 15<br>0 | 0   | 750 | 24<br>0 | 5.5 | 80 |  | 214<br>4 | 1019<br>3 |
| R180W<br>180 | 60 | 409 | 395 | 26<br>3 | 12.4 | 120 | 300 | 6500 | 8153      | 15<br>0 | 409 | 750 | 24<br>0 | 5.5 | 80 |  | 495<br>2 | 1310<br>5 |
| R180W<br>240 | 60 | 409 | 395 | 26<br>3 | 12.4 | 120 | 300 | 6500 | 8329      | 15<br>0 | 545 | 750 | 24<br>0 | 5.5 | 80 |  | 645<br>0 | 1477<br>8 |
| R180W<br>300 | 60 | 409 | 395 | 26<br>3 | 12.4 | 120 | 300 | 6500 | 8330      | 15<br>0 | 682 | 750 | 24<br>0 | 5.5 | 80 |  | 599<br>0 | 1431<br>9 |
| R180W<br>360 | 60 | 409 | 395 | 26<br>3 | 12.4 | 120 | 300 | 6500 | 8328      | 15<br>0 | 818 | 750 | 24<br>0 | 5.5 | 80 |  | 531<br>7 | 1364<br>5 |
| R240W<br>0   | 60 | 545 | 395 | 26<br>3 | 12.4 | 120 | 300 | 6500 | 9711      | 15<br>0 | 0   | 750 | 24<br>0 | 5.5 | 80 |  | 233<br>3 | 1204<br>4 |
| R240W<br>180 | 60 | 545 | 395 | 26<br>3 | 12.4 | 120 | 300 | 6500 | 9760      | 15<br>0 | 409 | 750 | 24<br>0 | 5.5 | 80 |  | 507<br>8 | 1483<br>7 |
| R240W<br>240 | 60 | 545 | 395 | 26<br>3 | 12.4 | 120 | 300 | 6500 | 9809      | 15<br>0 | 545 | 750 | 24<br>0 | 5.5 | 80 |  | 655<br>7 | 1636<br>5 |
| R240W<br>300 | 60 | 545 | 395 | 26<br>3 | 12.4 | 120 | 300 | 6500 | 9810      | 15<br>0 | 682 | 750 | 24<br>0 | 5.5 | 80 |  | 603<br>4 | 1584<br>4 |
| R240W<br>360 | 60 | 545 | 395 | 26<br>3 | 12.4 | 120 | 300 | 6500 | 9813      | 15<br>0 | 818 | 750 | 24<br>0 | 5.5 | 80 |  | 530<br>6 | 1511<br>9 |
| R300W<br>0   | 60 | 682 | 395 | 26<br>3 | 12.4 | 120 | 300 | 6500 | 1089<br>7 | 15<br>0 | 0   | 750 | 24<br>0 | 5.5 | 80 |  | 280<br>8 | 1370<br>4 |
| R300W<br>180 | 60 | 682 | 395 | 26<br>3 | 12.4 | 120 | 300 | 6500 | 1095<br>2 | 15<br>0 | 409 | 750 | 24<br>0 | 5.5 | 80 |  | 536<br>4 | 1631<br>7 |
| R300W<br>240 | 60 | 682 | 395 | 26<br>3 | 12.4 | 120 | 300 | 6500 | 1096<br>2 | 15<br>0 | 545 | 750 | 24<br>0 | 5.5 | 80 |  | 657<br>9 | 1754<br>1 |
| R300W<br>300 | 60 | 682 | 395 | 26<br>3 | 12.4 | 120 | 300 | 6500 | 1097<br>8 | 15<br>0 | 682 | 750 | 24<br>0 | 5.5 | 80 |  | 582<br>2 | 1680<br>0 |

|              |    |     |     |         |      |     |     |      |           |         |     |     |         |     |    |  |          |           |
|--------------|----|-----|-----|---------|------|-----|-----|------|-----------|---------|-----|-----|---------|-----|----|--|----------|-----------|
| R300W<br>360 | 60 | 682 | 395 | 26<br>3 | 12.4 | 120 | 300 | 6500 | 1071<br>5 | 15<br>0 | 818 | 750 | 24<br>0 | 5.5 | 80 |  | 519<br>8 | 1591<br>4 |
| R360W<br>0   | 60 | 818 | 395 | 26<br>3 | 12.4 | 120 | 300 | 6500 | 9953      | 15<br>0 | 0   | 750 | 24<br>0 | 5.5 | 80 |  | 274<br>1 | 1269<br>4 |
| R360W<br>180 | 60 | 818 | 395 | 26<br>3 | 12.4 | 120 | 300 | 6500 | 9921      | 15<br>0 | 409 | 750 | 24<br>0 | 5.5 | 80 |  | 559<br>2 | 1551<br>3 |
| R360W<br>240 | 60 | 818 | 395 | 26<br>3 | 12.4 | 120 | 300 | 6500 | 9901      | 15<br>0 | 545 | 750 | 24<br>0 | 5.5 | 80 |  | 651<br>0 | 1641<br>1 |
| R360W<br>300 | 60 | 818 | 395 | 26<br>3 | 12.4 | 120 | 300 | 6500 | 9914      | 15<br>0 | 682 | 750 | 24<br>0 | 5.5 | 80 |  | 567<br>4 | 1558<br>7 |
| R360W<br>360 | 60 | 818 | 395 | 26<br>3 | 12.4 | 120 | 300 | 6500 | 9881      | 15<br>0 | 818 | 750 | 24<br>0 | 5.5 | 80 |  | 511<br>2 | 1499<br>2 |
| R420W<br>0   | 60 | 955 | 395 | 26<br>3 | 12.4 | 120 | 300 | 6500 | 9325      | 15<br>0 | 0   | 750 | 24<br>0 | 5.5 | 80 |  | 300<br>0 | 1232<br>5 |
| R420W<br>180 | 60 | 955 | 395 | 26<br>3 | 12.4 | 120 | 300 | 6500 | 9311      | 15<br>0 | 409 | 750 | 24<br>0 | 5.5 | 80 |  | 555<br>1 | 1486<br>3 |
| R420W<br>240 | 60 | 955 | 395 | 26<br>3 | 12.4 | 120 | 300 | 6500 | 9303      | 15<br>0 | 545 | 750 | 24<br>0 | 5.5 | 80 |  | 650<br>0 | 1580<br>3 |
| R420W<br>300 | 60 | 955 | 395 | 26<br>3 | 12.4 | 120 | 300 | 6500 | 9293      | 15<br>0 | 682 | 750 | 24<br>0 | 5.5 | 80 |  | 560<br>2 | 1489<br>5 |
| R420W<br>360 | 60 | 955 | 395 | 26<br>3 | 12.4 | 120 | 300 | 6500 | 9282      | 15<br>0 | 818 | 750 | 24<br>0 | 5.5 | 80 |  | 505<br>2 | 1433<br>4 |

<sup>a</sup> Pesticides were calculated as the total of insecticide, herbicide, and fungicide (active ingredient).

**Table S3.** On-field environmental pollutants from rice cultivation (2021).

| Treatment | CH <sub>4</sub>     | N <sub>2</sub> O      | NO <sub>x</sub>       | NH <sub>3</sub>       | N<br>leaching         | N runoff              | P runoff            | P<br>leaching       | Cd                  | Pb                  | Cu                  | Zn                  |
|-----------|---------------------|-----------------------|-----------------------|-----------------------|-----------------------|-----------------------|---------------------|---------------------|---------------------|---------------------|---------------------|---------------------|
|           | kg ha <sup>-1</sup> | kg N ha <sup>-1</sup> | kg ha <sup>-1</sup> |
| R0W0      | 176.20              | 0.03                  | 0.00                  | 0.00                  | 0.00                  | 0.00                  | 0.7054              | 0.0947              | 0.0028              | 0.0021              | 0.0037              | 0.0266              |
| R0W180    | 238.12              | 0.06                  | 0.00                  | 0.00                  | 0.00                  | 0.00                  | 0.7054              | 0.0947              | 0.0028              | 0.0021              | 0.0037              | 0.0266              |
| R0W240    | 267.31              | 0.08                  | 0.00                  | 0.00                  | 0.00                  | 0.00                  | 0.7054              | 0.0947              | 0.0028              | 0.0021              | 0.0037              | 0.0266              |
| R0W300    | 262.35              | 0.08                  | 0.00                  | 0.00                  | 0.00                  | 0.00                  | 0.7054              | 0.0947              | 0.0028              | 0.0021              | 0.0037              | 0.0266              |
| R0W360    | 252.21              | 0.07                  | 0.00                  | 0.00                  | 0.00                  | 0.00                  | 0.7054              | 0.0947              | 0.0028              | 0.0021              | 0.0037              | 0.0266              |
| R180W0    | 179.30              | 1.35                  | 0.01                  | 32.76                 | 3.24                  | 4.86                  | 0.7054              | 0.0947              | 0.0029              | 0.0040              | 0.0039              | 0.0269              |
| R180W180  | 245.84              | 1.39                  | 0.01                  | 32.76                 | 3.24                  | 4.86                  | 0.7054              | 0.0947              | 0.0029              | 0.0040              | 0.0039              | 0.0269              |
| R180W240  | 269.85              | 1.40                  | 0.01                  | 32.76                 | 3.24                  | 4.86                  | 0.7054              | 0.0947              | 0.0029              | 0.0040              | 0.0039              | 0.0269              |
| R180W300  | 264.25              | 1.40                  | 0.01                  | 32.76                 | 3.24                  | 4.86                  | 0.7054              | 0.0947              | 0.0029              | 0.0040              | 0.0039              | 0.0269              |
| R180W360  | 249.63              | 1.39                  | 0.01                  | 32.76                 | 3.24                  | 4.86                  | 0.7054              | 0.0947              | 0.0029              | 0.0040              | 0.0039              | 0.0269              |
| R240W0    | 182.42              | 1.79                  | 0.01                  | 43.68                 | 4.32                  | 6.48                  | 0.7054              | 0.0947              | 0.0029              | 0.0046              | 0.0040              | 0.0270              |
| R240W180  | 250.57              | 1.83                  | 0.01                  | 43.68                 | 4.32                  | 6.48                  | 0.7054              | 0.0947              | 0.0029              | 0.0046              | 0.0040              | 0.0270              |
| R240W240  | 273.25              | 1.84                  | 0.01                  | 43.68                 | 4.32                  | 6.48                  | 0.7054              | 0.0947              | 0.0029              | 0.0046              | 0.0040              | 0.0270              |
| R240W300  | 261.12              | 1.84                  | 0.01                  | 43.68                 | 4.32                  | 6.48                  | 0.7054              | 0.0947              | 0.0029              | 0.0046              | 0.0040              | 0.0270              |
| R240W360  | 253.27              | 1.83                  | 0.01                  | 43.68                 | 4.32                  | 6.48                  | 0.7054              | 0.0947              | 0.0029              | 0.0046              | 0.0040              | 0.0270              |
| R300W0    | 193.99              | 2.23                  | 0.01                  | 54.60                 | 5.40                  | 8.10                  | 0.7054              | 0.0947              | 0.0030              | 0.0052              | 0.0041              | 0.0270              |

|              |        |      |      |       |      |       |        |        |        |        |        |        |
|--------------|--------|------|------|-------|------|-------|--------|--------|--------|--------|--------|--------|
| R300W18<br>0 | 254.33 | 2.27 | 0.01 | 54.60 | 5.40 | 8.10  | 0.7054 | 0.0947 | 0.0030 | 0.0052 | 0.0041 | 0.0270 |
| R300W24<br>0 | 276.05 | 2.28 | 0.01 | 54.60 | 5.40 | 8.10  | 0.7054 | 0.0947 | 0.0030 | 0.0052 | 0.0041 | 0.0270 |
| R300W30<br>0 | 262.93 | 2.28 | 0.01 | 54.60 | 5.40 | 8.10  | 0.7054 | 0.0947 | 0.0030 | 0.0052 | 0.0041 | 0.0270 |
| R300W36<br>0 | 251.21 | 2.27 | 0.01 | 54.60 | 5.40 | 8.10  | 0.7054 | 0.0947 | 0.0030 | 0.0052 | 0.0041 | 0.0270 |
| R360W0       | 196.68 | 2.67 | 0.02 | 65.52 | 6.48 | 9.72  | 0.7054 | 0.0947 | 0.0030 | 0.0058 | 0.0041 | 0.0271 |
| R360W18<br>0 | 257.29 | 2.71 | 0.02 | 65.52 | 6.48 | 9.72  | 0.7054 | 0.0947 | 0.0030 | 0.0058 | 0.0041 | 0.0271 |
| R360W24<br>0 | 272.98 | 2.72 | 0.02 | 65.52 | 6.48 | 9.72  | 0.7054 | 0.0947 | 0.0030 | 0.0058 | 0.0041 | 0.0271 |
| R360W30<br>0 | 259.96 | 2.71 | 0.02 | 65.52 | 6.48 | 9.72  | 0.7054 | 0.0947 | 0.0030 | 0.0058 | 0.0041 | 0.0271 |
| R360W36<br>0 | 253.36 | 2.71 | 0.02 | 65.52 | 6.48 | 9.72  | 0.7054 | 0.0947 | 0.0030 | 0.0058 | 0.0041 | 0.0271 |
| R420W0       | 201.34 | 3.11 | 0.02 | 76.44 | 7.56 | 11.34 | 0.7054 | 0.0947 | 0.0030 | 0.0065 | 0.0042 | 0.0272 |
| R420W18<br>0 | 258.36 | 3.15 | 0.02 | 76.44 | 7.56 | 11.34 | 0.7054 | 0.0947 | 0.0030 | 0.0065 | 0.0042 | 0.0272 |
| R420W24<br>0 | 269.63 | 3.16 | 0.02 | 76.44 | 7.56 | 11.34 | 0.7054 | 0.0947 | 0.0030 | 0.0065 | 0.0042 | 0.0272 |
| R420W30<br>0 | 258.89 | 3.15 | 0.02 | 76.44 | 7.56 | 11.34 | 0.7054 | 0.0947 | 0.0030 | 0.0065 | 0.0042 | 0.0272 |
| R420W36<br>0 | 252.21 | 3.15 | 0.02 | 76.44 | 7.56 | 11.34 | 0.7054 | 0.0947 | 0.0030 | 0.0065 | 0.0042 | 0.0272 |



**Table S4.** On-field environmental pollutants from wheat cultivation (2021–2022)

| Treatment | N <sub>2</sub> O      | NO <sub>x</sub>       | NH <sub>3</sub>       | N leaching            | N runoff              | P runoff            | P leaching          | Cd                  | Pb                  | Cu                  | Zn                  |
|-----------|-----------------------|-----------------------|-----------------------|-----------------------|-----------------------|---------------------|---------------------|---------------------|---------------------|---------------------|---------------------|
|           | kg N ha <sup>-1</sup> | kg ha <sup>-1</sup> |
| R0W0      | 0.40                  | 0.00                  | 0.00                  | 0.00                  | 0.00                  | 1.7190              | 0.2970              | 0.0028              | 0.0023              | 0.0063              | 0.0480              |
| R0W180    | 2.61                  | 0.71                  | 9.90                  | 6.30                  | 13.14                 | 1.7190              | 0.2970              | 0.0029              | 0.0041              | 0.0065              | 0.0483              |
| R0W240    | 3.32                  | 0.94                  | 13.20                 | 8.40                  | 17.52                 | 1.7190              | 0.2970              | 0.0029              | 0.0048              | 0.0065              | 0.0484              |
| R0W300    | 4.03                  | 1.18                  | 16.50                 | 10.50                 | 21.90                 | 1.7190              | 0.2970              | 0.0029              | 0.0054              | 0.0066              | 0.0485              |
| R0W360    | 4.73                  | 1.41                  | 19.80                 | 12.60                 | 26.28                 | 1.7190              | 0.2970              | 0.0029              | 0.0060              | 0.0067              | 0.0486              |
| R180W0    | 0.62                  | 0.00                  | 0.00                  | 0.00                  | 0.00                  | 1.7190              | 0.2970              | 0.0028              | 0.0023              | 0.0063              | 0.0480              |
| R180W180  | 2.75                  | 0.71                  | 9.90                  | 6.30                  | 13.14                 | 1.7190              | 0.2970              | 0.0029              | 0.0041              | 0.0065              | 0.0483              |
| R180W240  | 3.47                  | 0.94                  | 13.20                 | 8.40                  | 17.52                 | 1.7190              | 0.2970              | 0.0029              | 0.0048              | 0.0065              | 0.0484              |
| R180W300  | 4.17                  | 1.18                  | 16.50                 | 10.50                 | 21.90                 | 1.7190              | 0.2970              | 0.0029              | 0.0054              | 0.0066              | 0.0485              |
| R180W360  | 4.88                  | 1.41                  | 19.80                 | 12.60                 | 26.28                 | 1.7190              | 0.2970              | 0.0029              | 0.0060              | 0.0067              | 0.0486              |
| R240W0    | 0.74                  | 0.00                  | 0.00                  | 0.00                  | 0.00                  | 1.7190              | 0.2970              | 0.0028              | 0.0023              | 0.0063              | 0.0480              |
| R240W180  | 2.87                  | 0.71                  | 9.90                  | 6.30                  | 13.14                 | 1.7190              | 0.2970              | 0.0029              | 0.0041              | 0.0065              | 0.0483              |
| R240W240  | 3.58                  | 0.94                  | 13.20                 | 8.40                  | 17.52                 | 1.7190              | 0.2970              | 0.0029              | 0.0048              | 0.0065              | 0.0484              |
| R240W300  | 4.29                  | 1.18                  | 16.50                 | 10.50                 | 21.90                 | 1.7190              | 0.2970              | 0.0029              | 0.0054              | 0.0066              | 0.0485              |
| R240W360  | 4.99                  | 1.41                  | 19.80                 | 12.60                 | 26.28                 | 1.7190              | 0.2970              | 0.0029              | 0.0060              | 0.0067              | 0.0486              |
| R300W0    | 0.84                  | 0.00                  | 0.00                  | 0.00                  | 0.00                  | 1.7190              | 0.2970              | 0.0028              | 0.0023              | 0.0063              | 0.0480              |
| R300W180  | 2.96                  | 0.71                  | 9.90                  | 6.30                  | 13.14                 | 1.7190              | 0.2970              | 0.0029              | 0.0041              | 0.0065              | 0.0483              |
| R300W240  | 3.67                  | 0.94                  | 13.20                 | 8.40                  | 17.52                 | 1.7190              | 0.2970              | 0.0029              | 0.0048              | 0.0065              | 0.0484              |
| R300W300  | 4.38                  | 1.18                  | 16.50                 | 10.50                 | 21.90                 | 1.7190              | 0.2970              | 0.0029              | 0.0054              | 0.0066              | 0.0485              |
| R300W360  | 5.06                  | 1.41                  | 19.80                 | 12.60                 | 26.28                 | 1.7190              | 0.2970              | 0.0029              | 0.0060              | 0.0067              | 0.0486              |
| R360W0    | 0.76                  | 0.00                  | 0.00                  | 0.00                  | 0.00                  | 1.7190              | 0.2970              | 0.0028              | 0.0023              | 0.0063              | 0.0480              |
| R360W180  | 2.88                  | 0.71                  | 9.90                  | 6.30                  | 13.14                 | 1.7190              | 0.2970              | 0.0029              | 0.0041              | 0.0065              | 0.0483              |
| R360W240  | 3.59                  | 0.94                  | 13.20                 | 8.40                  | 17.52                 | 1.7190              | 0.2970              | 0.0029              | 0.0048              | 0.0065              | 0.0484              |
| R360W300  | 4.29                  | 1.18                  | 16.50                 | 10.50                 | 21.90                 | 1.7190              | 0.2970              | 0.0029              | 0.0054              | 0.0066              | 0.0485              |
| R360W360  | 5.00                  | 1.41                  | 19.80                 | 12.60                 | 26.28                 | 1.7190              | 0.2970              | 0.0029              | 0.0060              | 0.0067              | 0.0486              |

|          |      |      |       |       |       |        |        |        |        |        |        |
|----------|------|------|-------|-------|-------|--------|--------|--------|--------|--------|--------|
| R420W0   | 0.72 | 0.00 | 0.00  | 0.00  | 0.00  | 1.7190 | 0.2970 | 0.0028 | 0.0023 | 0.0063 | 0.0480 |
| R420W180 | 2.83 | 0.71 | 9.90  | 6.30  | 13.14 | 1.7190 | 0.2970 | 0.0029 | 0.0041 | 0.0065 | 0.0483 |
| R420W240 | 3.54 | 0.94 | 13.20 | 8.40  | 17.52 | 1.7190 | 0.2970 | 0.0029 | 0.0048 | 0.0065 | 0.0484 |
| R420W300 | 4.25 | 1.18 | 16.50 | 10.50 | 21.90 | 1.7190 | 0.2970 | 0.0029 | 0.0054 | 0.0066 | 0.0485 |
| R420W360 | 4.95 | 1.41 | 19.80 | 12.60 | 26.28 | 1.7190 | 0.2970 | 0.0029 | 0.0060 | 0.0067 | 0.0486 |

## 1. Paddy-field CH<sub>4</sub> emissions

The CH<sub>4</sub> emissions from rice cultivation were calculated using Equation (S2), which is based on [22] (Tier 2).

$$Q_{CH_4} = EF_i \times t \times A \quad (S1)$$

where  $Q_{CH_4}$  is total methane emissions from rice cultivation (kg CH<sub>4</sub> ha<sup>-1</sup> day<sup>-1</sup>),  $EF_i$  is adjusted daily emission factor for a particular harvested area (kg CH<sub>4</sub> ha<sup>-1</sup> day<sup>-1</sup>),  $t$  denotes cultivation period of rice (day), with the value of 138; and  $A$  denotes annual harvested area of rice (ha year<sup>-1</sup>).

Emissions from each different region can be calculated by multiplying a baseline default emissions factor with various scaling factors, as shown in Equation (S3) [22].

$$EF_i = EF_c \times SF_w \times SF_p \times SF_o \times SF_{s,r} \quad (S2)$$

where  $EF_c$  is the baseline emission factor for continuously flooded fields without organic amendments, with the value of 1.32;  $SF_w$  is a scaling factor to account for the differences in water regime during the cultivation period, with the value of 0.71;  $SF_p$  is a scaling factor to account for the differences in water regime in the pre-season before the cultivation period, with the value of 0.89;  $SF_o$  is a scaling factor that should vary for both type and amount of organic amendment applied and can be calculated by equation (4); and  $SF_{s,r}$  is a scaling factor for soil type, rice cultivar, etc., if available.

The default conversion factor for farmyard manure was calculated by Equation (S4):

$$SF_o = (1 + \sum_i ROA_i \times CFA_i)^{0.59} \quad (S3)$$

where  $SF_o$  is the scaling factor for both type and amount of organic amendment applied;  $ROA_i$  is the application rate of organic amendment  $i$ , in dry weight for straw and fresh weight for others in tons ha<sup>-1</sup>; and  $CFA_i$  is the conversion factor for organic amendment  $i$  (in terms of its relative effect, with respect to straw applied shortly before cultivation). In this study, organic amendment only indicates straw incorporation.

## 2. On-field N<sub>2</sub>O emissions

The formula for estimating indirect N<sub>2</sub>O emissions was as follows [22]:

$$Q_{N_2O (Indirect)} = [(F_{SN} \times \text{Frac}_{GASF} \times EF_4 + (F_{SN} + F_{CR}) \times \text{Frac}_{LEACH-(H)} \times EF_5) \times 44/28] \quad (S4)$$

where  $Q_{N_2O (Indirect)}$  is the total indirect N<sub>2</sub>O emissions (kg N<sub>2</sub>O year<sup>-1</sup>);  $F_{SN}$  is the annual amount of synthetic N fertilizer applied to soils (kg N year<sup>-1</sup>);  $F_{CR}$  is the annual amount of N in crop residues (kg N year<sup>-1</sup>);  $\text{Frac}_{GASF}$  is the fraction of synthetic N fertilizer that volatilizes as NH<sub>3</sub> and NO<sub>x</sub>, kg N volatilized (kg of N applied)<sup>-1</sup>;  $EF_4$  is the emission factor for N<sub>2</sub>O emissions from atmospheric deposition of N on soils and water surfaces, kg N–N<sub>2</sub>O (kg NH<sub>3</sub>–N+NO<sub>x</sub>–N

volatilized)<sup>-1</sup>, with the value of 0.01;  $Fra_{CLEACH-(H)}$  is the fraction of all N added to, or mineralized in, managed soils in regions where leaching or runoff occurs that is lost through leaching and runoff, kg N (kg of N additions)<sup>-1</sup>; and  $EF_5$  is the emission factor for N<sub>2</sub>O emissions from N leaching and runoff, kg N<sub>2</sub>O–N (kg N leached and runoff)<sup>-1</sup>, with the value of 0.011.

**Table S5.** Emission factors of reactive N from N fertilization and P loss in the field.

| Loss pathways                  | Unit                  | Emission factors |         | Reference |
|--------------------------------|-----------------------|------------------|---------|-----------|
|                                |                       | Rice             | Wheat   |           |
| Direct N <sub>2</sub> O        | kg N kg <sup>-1</sup> | 0.005            | 0.01    | [22]      |
| NO <sub>x</sub>                | kg N kg <sup>-1</sup> | 0.000047         | 0.00392 | [23]      |
| N leaching                     | kg N kg <sup>-1</sup> | 0.018            | 0.035   | [25]      |
| N runoff                       | kg N kg <sup>-1</sup> | 0.027            | 0.073   | [25]      |
| NH <sub>3</sub> volatilization | kg N kg <sup>-1</sup> | 0.182            | 0.055   | [24]      |
| P leaching                     | kg P kg <sup>-1</sup> | 0.002            | 0.0033  | [26,27]   |
| P runoff                       | kg P kg <sup>-1</sup> | 0.0149           | 0.0191  | [28]      |

**Table S6.** Normalization reference value and weight coefficient of world per-capita environmental impact for 2010.

| Impact category                   | Units                   | Reference value [34] | Weight |
|-----------------------------------|-------------------------|----------------------|--------|
| Global warming                    | kg CO <sub>2</sub> eq   | 7990.41              | 0.113  |
| Fine particulate matter formation | kg PM <sub>2.5</sub> eq | 25.57                | 0.063  |
| Terrestrial acidification         | kg SO <sub>2</sub> eq   | 40.98                | 0.081  |
| Freshwater eutrophication         | kg P eq                 | 0.65                 | 0.143  |
| Terrestrial ecotoxicity           | kg 1,4-DCB              | 15200.31             | 0.129  |
| Freshwater ecotoxicity            | kg 1,4-DCB              | 25.17                | 0.134  |
| Human carcinogenic toxicity       | kg 1,4-DCB              | 10.30                | 0.109  |
| Human non-carcinogenic toxicity   | kg 1,4-DCB              | 31251.84             | 0.087  |
| Fossil resource scarcity          | kg oil eq               | 569.90               | 0.057  |
| Water consumption                 | m <sup>3</sup>          | 266.64               | 0.084  |

**Table S7.** Economic profit analysis of rice-wheat rotation with different N-fertilizer treatment (2021–2022).

| Treatment | Seed<br>CNY<br>ha <sup>-1</sup> | N fertilizer<br>CNY ha <sup>-1</sup> | P fertilizer<br>CNY ha <sup>-1</sup> | K fertilizer<br>CNY ha <sup>-1</sup> | Pesticide<br>CNY ha <sup>-1</sup> | Field management<br>CNY ha <sup>-1</sup> | Cost<br>CNY ha <sup>-1</sup> | Revenue <sup>a</sup><br>CNY ha <sup>-1</sup> | Profit <sup>b</sup><br>CNY ha <sup>-1</sup> |
|-----------|---------------------------------|--------------------------------------|--------------------------------------|--------------------------------------|-----------------------------------|------------------------------------------|------------------------------|----------------------------------------------|---------------------------------------------|
| R0W0      | 1980                            | 0                                    | 2861                                 | 1256                                 | 353                               | 8255                                     | 14705                        | 17225                                        | 2519                                        |
| R0W180    | 1980                            | 1023                                 | 2861                                 | 1256                                 | 353                               | 8255                                     | 15728                        | 27544                                        | 11816                                       |
| R0W240    | 1980                            | 1364                                 | 2861                                 | 1256                                 | 353                               | 8255                                     | 16069                        | 31527                                        | 15459                                       |
| R0W300    | 1980                            | 1705                                 | 2861                                 | 1256                                 | 353                               | 8255                                     | 16410                        | 29898                                        | 13489                                       |
| R0W360    | 1980                            | 2045                                 | 2861                                 | 1256                                 | 353                               | 8255                                     | 16751                        | 29192                                        | 12441                                       |
| R180W0    | 1980                            | 1023                                 | 2861                                 | 1256                                 | 353                               | 8255                                     | 15728                        | 25859                                        | 10131                                       |
| R180W180  | 1980                            | 2045                                 | 2861                                 | 1256                                 | 353                               | 8255                                     | 16751                        | 32587                                        | 15836                                       |
| R180W240  | 1980                            | 2386                                 | 2861                                 | 1256                                 | 353                               | 8255                                     | 17091                        | 36489                                        | 19397                                       |
| R180W300  | 1980                            | 2727                                 | 2861                                 | 1256                                 | 353                               | 8255                                     | 17432                        | 35433                                        | 18000                                       |
| R180W360  | 1980                            | 3068                                 | 2861                                 | 1256                                 | 353                               | 8255                                     | 17773                        | 33883                                        | 16109                                       |
| R240W0    | 1980                            | 1364                                 | 2861                                 | 1256                                 | 353                               | 8255                                     | 16069                        | 30615                                        | 14546                                       |
| R240W180  | 1980                            | 2386                                 | 2861                                 | 1256                                 | 353                               | 8255                                     | 17091                        | 37054                                        | 19962                                       |
| R240W240  | 1980                            | 2727                                 | 2861                                 | 1256                                 | 353                               | 8255                                     | 17432                        | 40583                                        | 23150                                       |
| R240W300  | 1980                            | 3068                                 | 2861                                 | 1256                                 | 353                               | 8255                                     | 17773                        | 39385                                        | 21612                                       |
| R240W360  | 1980                            | 3409                                 | 2861                                 | 1256                                 | 353                               | 8255                                     | 18114                        | 37717                                        | 19602                                       |
| R300W0    | 1980                            | 1705                                 | 2861                                 | 1256                                 | 353                               | 8255                                     | 16410                        | 34789                                        | 18379                                       |
| R300W180  | 1980                            | 2727                                 | 2861                                 | 1256                                 | 353                               | 8255                                     | 17432                        | 40814                                        | 23381                                       |
| R300W240  | 1980                            | 3068                                 | 2861                                 | 1256                                 | 353                               | 8255                                     | 17773                        | 43634                                        | 25860                                       |
| R300W300  | 1980                            | 3409                                 | 2861                                 | 1256                                 | 353                               | 8255                                     | 18114                        | 41932                                        | 23818                                       |
| R300W360  | 1980                            | 3750                                 | 2861                                 | 1256                                 | 353                               | 8255                                     | 18455                        | 39816                                        | 21361                                       |
| R360W0    | 1980                            | 2045                                 | 2861                                 | 1256                                 | 353                               | 8255                                     | 16751                        | 32181                                        | 15431                                       |
| R360W180  | 1980                            | 3068                                 | 2861                                 | 1256                                 | 353                               | 8255                                     | 17773                        | 38657                                        | 20884                                       |
| R360W240  | 1980                            | 3409                                 | 2861                                 | 1256                                 | 353                               | 8255                                     | 18114                        | 40715                                        | 22601                                       |
| R360W300  | 1980                            | 3750                                 | 2861                                 | 1256                                 | 353                               | 8255                                     | 18455                        | 38824                                        | 20369                                       |

|          |      |      |      |      |     |      |       |       |       |
|----------|------|------|------|------|-----|------|-------|-------|-------|
| R360W360 | 1980 | 4091 | 2861 | 1256 | 353 | 8255 | 18796 | 37446 | 18650 |
| R420W0   | 1980 | 2386 | 2861 | 1256 | 353 | 8255 | 17091 | 31144 | 14052 |
| R420W180 | 1980 | 3409 | 2861 | 1256 | 353 | 8255 | 18114 | 36977 | 18863 |
| R420W240 | 1980 | 3750 | 2861 | 1256 | 353 | 8255 | 18455 | 39137 | 20682 |
| R420W300 | 1980 | 4091 | 2861 | 1256 | 353 | 8255 | 18796 | 37047 | 18251 |
| R420W360 | 1980 | 4432 | 2861 | 1256 | 353 | 8255 | 19137 | 35753 | 16616 |

<sup>a</sup> The price of rice and wheat was 2.6 CNY and 2.3 CNY per kilogram, according to National Development and Reform Commission of the People's Republic of China (<https://www.ndrc.gov.cn/>).

<sup>b</sup> Profit = Revenue - Cost

Profit-based impacts: Unit (CNY  $10^3$ )<sup>-1</sup>

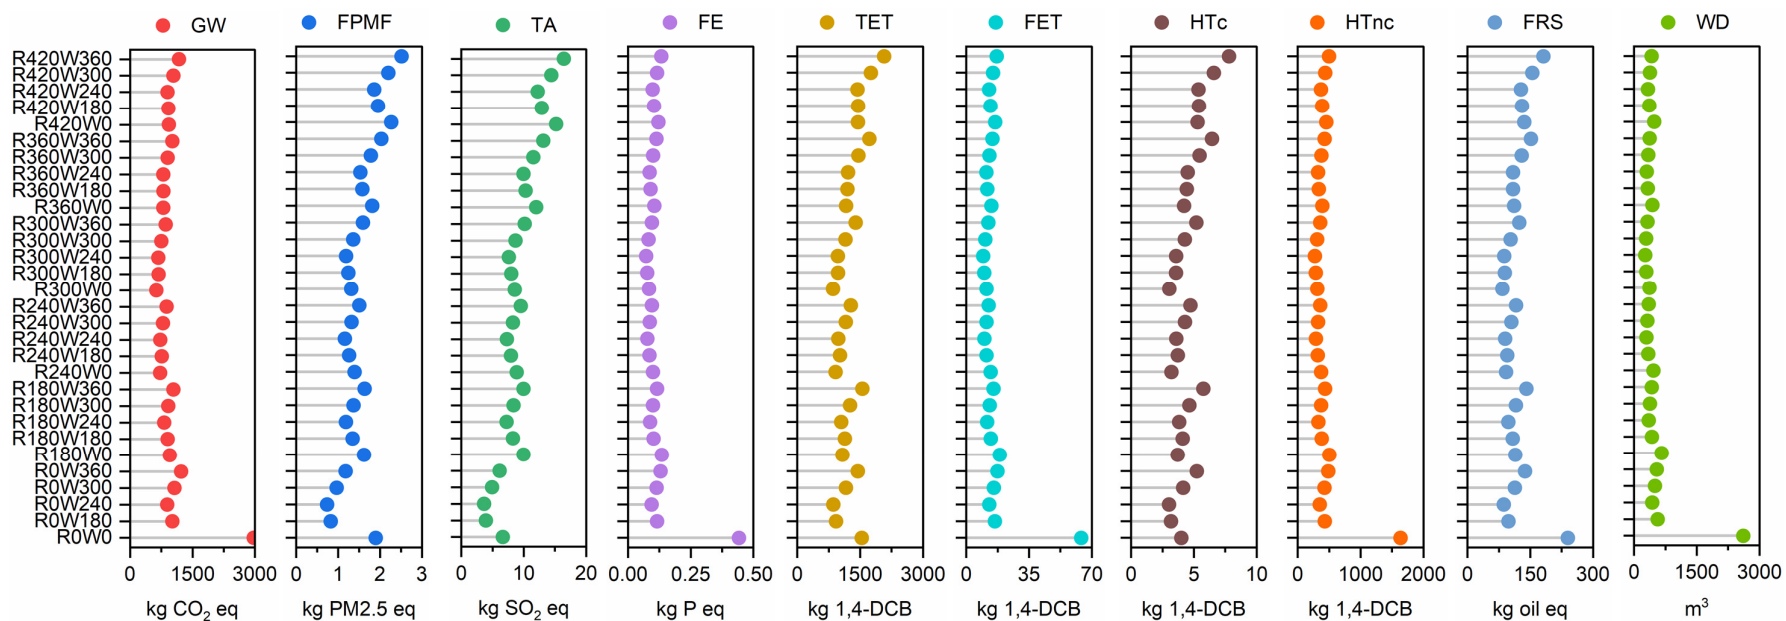

**Figure S1.** Environmental impacts per CNY  $10^3$  economic profit of rice-wheat rotation system with different fertilization modes.

**Table S8.** Uncertainty analysis of environmental impacts for rice-wheat rotation (Treatment: R300W240).

| Impact category                   | Unit                                     | Mean     | Median   | SD       | CV (%) | 2.5%     | 97.5%    |
|-----------------------------------|------------------------------------------|----------|----------|----------|--------|----------|----------|
| Global warming                    | kg CO <sub>2</sub> eq ha <sup>-1</sup>   | 17493.60 | 17438.58 | 839.93   | 4.80   | 16017.17 | 19313.31 |
| Fine particulate matter formation | kg PM <sub>2.5</sub> eq ha <sup>-1</sup> | 30.74    | 30.66    | 1.45     | 4.73   | 28.19    | 33.88    |
| Terrestrial acidification         | kg SO <sub>2</sub> eq ha <sup>-1</sup>   | 196.96   | 196.87   | 7.37     | 3.74   | 183.04   | 210.99   |
| Freshwater eutrophication         | kg P eq ha <sup>-1</sup>                 | 1.86     | 1.74     | 0.51     | 27.26  | 1.36     | 3.14     |
| Terrestrial ecotoxicity           | kg 1,4-DCB ha <sup>-1</sup>              | 25142.90 | 22911.96 | 10219.66 | 40.65  | 12893.78 | 49496.51 |
| Freshwater ecotoxicity            | kg 1,4-DCB ha <sup>-1</sup>              | 246.12   | 220.46   | 87.68    | 35.62  | 179.52   | 476.05   |
| Human carcinogenic toxicity       | kg 1,4-DCB ha <sup>-1</sup>              | 94.23    | 72.49    | 181.10   | 192.19 | 36.46    | 267.39   |
| Human non-carcinogenic toxicity   | kg 1,4-DCB ha <sup>-1</sup>              | 7023.14  | 6055.48  | 3291.09  | 46.86  | 4559.93  | 15637.86 |
| Fossil resource scarcity          | kg oil eq ha <sup>-1</sup>               | 2270.79  | 2230.05  | 358.09   | 15.77  | 1685.34  | 3086.56  |
| Water demand <sup>a</sup>         | m <sup>3</sup> ha <sup>-1</sup>          | 297.08   | 305.19   | 403.08   | 135.68 | 104.30   | 1031.56  |

<sup>a</sup> Water demand here exclude the irrigation water during the crop cultivation stage.



## Reference

22. IPCC. N<sub>2</sub>O Emissions from Managed Soils, and CO<sub>2</sub> Emissions from Lime and Urea Application. 2019 Refinement to the 2006 IPCC Guidelines for National Greenhouse Gas Inventories. 2019. pp. 1–48. Available online: <https://www.ipcc-nggip.iges.or.jp/public/2019rf/index.html> (accessed on 6 January 2024). Available at: <https://www.ipcc-nggip.iges.or.jp/public/2019rf/index.html>
23. Liu, S.; Lin, F.; Wu, S.; Ji, C.; Sun, Y.; Jin, Y.; Li, S.; Li, Z.; Zou, J. A meta-analysis of fertilizer-induced soil NO and combined NO+N<sub>2</sub>O emissions. *Glob. Chang. Biol.* **2017**, *23*, 2520–2532. <https://doi.org/10.1111/gcb.13485>.
24. Xie, Z.; Fan, P.; Wu, H.; Cheng, K.; Pan, G. Deriving volatile factors and estimating direct ammonia emissions for crop cultivation in China. *Huanjing Kexue Xuebao/Acta Sci. Circumstantiae* **2020**, *40*, 4180–4188. <https://doi.org/10.13671/j.hjkxxb.2020.0183>.
25. Xia, Y. Q.; Yang, W. X.; Shi, W. M.; Yan, X. Y. Estimation of nitrogen occurrence from non-point sources in intensive planting industry in China. *J. Ecol. Rural Environ.* **2018**, *34*, 782–787.
26. Han X.F.; Xie D.T.; Gao M.; Wang Z.F.; Chen C. Effects of reduced-phosphorus fertilizer and combinations of organic fertilizers on phosphorus leaching in purple paddy soil with conventional paddy-upland rotation tillage. *Acta Ecol. Sin.* **2017**, *37*, 3525–3532.
27. Gong, R.; Liu, Q.; Rong, X.; Zhang, Y. Effects of phosphorus fertilizer reduction on leaching loss of different phosphorus forms in upland land of central And Southern China. *J. Soil Water Conserv.* **2015**, *29*, 106–110.
- 28.. Wang, R.; Min, J.; Kronzucker, H. J.; Li, Y.; Shi, W. N and P runoff losses in China's vegetable production systems: Loss characteristics, impact, and management practices. *Sci. Total Environ.* **2019**, *663*, 971–979.
34. Sleeswijk, A.W.; van Oers, L.F.; Guinée, J.B.; Struijs, J.; Huijbregts, M.A. Normalisation in product life cycle assessment: an LCA of the global and European economic systems in the year 2000. *Sci. Total Environ.* **2008**, *39*, 227–240.
